# Supplementary material for: Acute exacerbation of interstitial lung diseases and mortality post-cryobiopsy: a multicenter cohort study
Source: PubMed Central journal article supplement — J Thorac Dis. 2024 Jul 22;16(7):4340–9. doi: 10.21037/jtd-24-270 (PMC11320243; doi:10.21037/jtd-24-270), 2024-07-22
Supplement: jtd-16-07-4340-dss.pdf [file jtd-16-07-4340-dss.pdf]

## Data Sharing Statement

|                     |                                                                                                                                                     |                                                                                                                  |
|---------------------|-----------------------------------------------------------------------------------------------------------------------------------------------------|------------------------------------------------------------------------------------------------------------------|
| <b>Article Info</b> | <a href="https://dx.doi.org/10.21037/jtd-24-270">https://dx.doi.org/10.21037/jtd-24-270</a>                                                         |                                                                                                                  |
| <b>Item</b>         | <b>Question</b>                                                                                                                                     | <b>Authors' Response<br/>(place "-" if not applicable)</b>                                                       |
| 1                   | Would you like to share data collected for your study to others?                                                                                    | Yes.                                                                                                             |
| 2                   | If not, would you like to share the reason for your decision?                                                                                       | -                                                                                                                |
| 3                   | What data in particular will be shared?                                                                                                             | All including that of demographics, procedural details and patient characteristics.                              |
| 4                   | Any other documents will be shared? Such as study protocol, statistical analysis plan, informed consent form, clinical study report, analytic code. | -                                                                                                                |
| 5                   | When will data availability begin?                                                                                                                  | From day of publication.                                                                                         |
| 6                   | When will data availability end?                                                                                                                    | Two years within the publication date.                                                                           |
| 7                   | To whom will you share the data?                                                                                                                    | Any interested party.                                                                                            |
| 8                   | For what type of analysis or purpose?                                                                                                               | Assess safety of cryobiopsy.                                                                                     |
| 9                   | How or where can the data/documents be obtained?                                                                                                    | By emailing corresponding author:<br>Hiren.Mehta@medicine.ufl.edu                                                |
| 10                  | Any other restrictions?                                                                                                                             | We may balance the potential benefits and risks for each request and then provide the data that could be shared. |
